# Supplementary material for: Integrated network pharmacology and experimental verification to investigate the mechanisms of YYFZBJS against colorectal cancer via CDK1/PI3K/Akt signaling
Source: Frontiers journal article supplement (doi:10.3389/fonc.2022.961653), 2022-11-15
Supplement: Table_1.xlsx [file Table_1.xlsx]

## Sheet: Sheet1
Active components list of YYFZBJS
Mol ID	Molecule name	OB (%)	DL	Herbs	CAS number	Pubchem CID
MOL001323	Sitosterol alpha1	43.28	0.78	YYR	474-40-8	9548595
MOL001494	Mandenol	42	0.19	YYR	544-35-4	5282184
MOL002372	(6Z,10E,14E,18E)-2,6,10,15,19,23-hexamethyltetracosa-2,6,10,14,18,22-hexaene	33.55	0.42	YYR	7683-64-9	11975273
MOL002882	[(2R)-2,3-dihydroxypropyl] (Z)-octadec-9-enoate	34.13	0.3	YYR	111-03-5	11451146
MOL008118	Coixenolide	32.4	0.43	YYR	29066-43-1	46173943
MOL008121	2-Monoolein	34.23	0.29	YYR	3443-84-3	5319879
MOL000953	CLR	37.87	0.68	YYR	80356-14-5	5997
MOL002211	11,14-eicosadienoic acid	39.99	0.2	FZ	2091-39-6	5282805
MOL002388	Delphin_qt	57.76	0.28	FZ	17670-06-3	10100905
MOL002392	Deltoin	46.69	0.37	FZ	19662-71-6	906525
MOL002393	Demethyldelavaine A	34.52	0.18	FZ	N/A	50879385
MOL002394	Demethyldelavaine B	34.52	0.18	FZ	N/A	52433717
MOL002395	Deoxyandrographolide	56.3	0.31	FZ	79233-15-1	15922991
MOL002397	karakoline	51.73	0.73	FZ	39089-30-0	441742
MOL002398	Karanjin	69.56	0.34	FZ	521-88-0	100633
MOL002401	Neokadsuranic acid B	43.1	0.85	FZ	123828-59-1	145709631
MOL002406	2,7-Dideacetyl-2,7-dibenzoyl-taxayunnanine F	39.43	0.38	FZ	N/A	52354019
MOL002410	benzoylnapelline	34.06	0.53	FZ	198126-85-1	25199685
MOL002415	6-Demethyldesoline	51.87	0.66	FZ	N/A	N/A
MOL002416	deoxyaconitine	30.96	0.24	FZ	3175-95-9	21598997
MOL002419	(R)-Norcoclaurine	82.54	0.21	FZ	106032-53-5	440988
MOL002421	ignavine	84.08	0.25	FZ	1357-76-2	71448929
MOL002422	isotalatizidine	50.82	0.73	FZ	7633-68-3	11452543
MOL002423	jesaconitine	33.41	0.19	FZ	16298-90-1	76963334
MOL002433	(3R,8S,9R,10R,13R,14S,17R)-3-hydroxy-4,4,9,13,14-pentamethyl-17-[(E,2R)-6-methyl-7-[(2R,3R,4S,5S,6R)-3,4,5-trihydroxy-6-[[(2R,3R,4S,5S,6R)-3,4,5-trihydroxy-6-(hydroxymethyl)oxan-2-yl]oxymethyl]oxan-2-yl]oxyhept-5-en-2-yl]-1,2,3,7,8,10,12,15,16,17-decahydr	41.52	0.22	FZ	N/A	6324887
MOL002434	Carnosifloside I_qt	38.16	0.8	FZ	109985-90-2	11953915
MOL000538	hypaconitine	31.39	0.26	FZ	6900-87-4	441737
MOL001676	Vilmorrianine C	33.96	0.22	BJC	73870-35-6	20055981
MOL001677	asperglaucide	58.02	0.52	BJC	56121-42-7	13855373
MOL001678	bolusanthol B	39.94	0.41	BJC	N/A	10594416
MOL001790	Linarin	39.84	0.71	BJC	480-36-4	5317025
MOL001689	acacetin	34.97	0.24	BJC	480-44-4	5280442
MOL002322	isovitexin	31.29	0.72	BJC	61838-34-4	162350
MOL001697	Sinoacutine	63.39	0.53	BJC	4090-18-0	821366
MOL000358	beta-sitosterol	36.91	0.75	BJC	83-46-5	222284
MOL000422	kaempferol	41.88	0.24	BJC	520-18-3	5280863
MOL000006	luteolin	36.16	0.25	BJC	491-70-3	5280445
MOL000098	quercetin	46.43	0.28	BJC	73123-10-1	5280343
MOL000359	sitosterol	36.91	0.75	YYR/FZ/BJC	83-46-5	12303645
MOL000449	Stigmasterol	43.83	0.76	YYR/BJC	83-48-7	5280794
